# Supplementary material for: Detection, characterization, and phylogenetic analysis of novel astroviruses from endemic Malagasy fruit bats
Source: Springer Nature journal article supplement (doi:10.1186/s12985-024-02471-2), 2024-08-23
Supplement: MOESM1 [file 12985_2024_2471_MOESM1_ESM.docx]

**SUPPLEMENTARY MATERIAL**

Table S1: Top 5 NCBI BLASTn results (nucleotide-nucleotide) for novel near-full length astrovirus genome (accession number OQ606244).

| **Description** | **Scientific Name** | **Host** | **Country** | **Max Score** | **Total Score** | **Query Cover** | **E-Value** | **Percent Identity** | **Accession Length** | **Accession** |
| --- | --- | --- | --- | --- | --- | --- | --- | --- | --- | --- |
| Mamastrovirus sp. isolate Astrovirus_PREDICT MAstV-132/AASMH clone 285121 RNA-dependent RNA polymerase gene, partial cds | Mamastrovirus sp. | Chiroptera | Tanzania | 302 | 302 | 5% | 8.00E-76 | 80.94% | 382 | KY054020 |
| Bat astrovirus isolate AstV/SC/L74.18/c2021 genomic sequence | Bat astrovirus | Hipposideros armiger | China | 71.3 | 71.3 | 0% | 2.00E-06 | 87.69% | 6708 | OQ236128 |
| Mamastrovirus 3 strain AstV3/Pig-wt/ESP/B377/2017, complete genome | Mamastrovirus 3 | Sus scrofa | Spain | 63.9 | 63.9 | 0% | 4.00E-04 | 100.00% | 6459 | MK962342 |
| Mamastrovirus 3 strain AstV3/Pig-wt/ESP/B333/2017, complete genome | Mamastrovirus 3 | Sus scrofa | Spain | 63.9 | 63.9 | 0% | 4.00E-04 | 100.00% | 6460 | MK962341 |
| Porcine astrovirus 3 strain USA/IA/7023/2017, complete genome | Porcine astrovirus | Porcine | USA | 63.9 | 63.9 | 0% | 4.00E-04 | 100.00% | 6461 | KY940545 |

Table S2: Top 5 NCBI BLASTx results (nucleotide-amino acid) for novel near-full length astrovirus genome (accession number OQ606244).

| **Description** | **Scientific Name** | **Host** | **Country** | **Max Score** | **Total Score** | **Query Cover** | **E-Value** | **Percent Identity** | **Accession Length** | **Accession** |
| --- | --- | --- | --- | --- | --- | --- | --- | --- | --- | --- |
| ORF1a [Bat astrovirus] |  |  |  |  |  |  |  |  |  |  |
| Bat astrovirus | Eidolon helvum | Cameroon | 691 | 691 | 40% | 0.0 | 43.09% | 891 | AWV67084 |  |
| Nonstructural protein [Raccoon dog astrovirus 3] | Raccoon dog astrovirus 3 | Raccoon dog | China | 538 | 973 | 62% | 0.0 | 52.43% | 1362 | ULF48000 |
| ORF1ab [Porcine astrovirus 3] | Porcine astrovirus 3 | Sus scrofa | Japan | 518 | 939 | 61% | 0.0 | 51.88% | 1353 | BAX00201 |
| ORF1ab [Porcine astrovirus 3] | Porcine astrovirus 3 | Sus scrofa | Japan | 517 | 938 | 61% | 0.0 | 51.88% | 1353 | BAX00204 |
| ORF1ab [Porcine astrovirus 3] | Porcine astrovirus 3 | Sus scrofa | Japan | 514 | 936 | 61% | 0.0 | 52.49% | 1353 | BAX00207 |

Table S3: Presence/absence of astroviruses detected in Madagascar bats to date.

| **Sub-Order** | **Family** | **Species** | **Detection** | **Citation** |
| --- | --- | --- | --- | --- |
| Yinpterochiroptera | Pteropodidae | *Pteropus rufus* | Yes | This paper |
|  |  | *Eidolon dupreanum* | Yes | This paper |
|  |  | *Rousettus madagascariensis* | Yes | This paper, Lebarbchenon et al |
|  | Rhinonycteridae | *Paratriaenops furculus* | Yes | Lebarbchenon et al, Hoarau et al |
|  |  | *Triaenops menamena* | Yes | Lebarbchenon et al, Hoarau et al |
|  | Hipposideridae | *Macronycterus commersoni* | Yes | Hoarau et al |
| Yangochiroptera | Molossidae | *Mormopterus jugularis* | No | Lebarbchenon et al, Hoarau et al |
|  |  | *Otomops madagascariensis* | No | Lebarbchenon et al, Hoarau et al |
|  |  | *Chaerephon atsinanana* | No | Hoarau et al |
|  |  | *Chaerephon leucogaster* | Yes | Hoarau et al |
|  |  | *Mops leucostigma* | Yes | Hoarau et al |
|  | Vespertilionidae | *Myotis goudoti* | Yes | Lebarbchenon et al, Hoarau et al |
|  |  | *Pipistrellus hesperidus* | No | Lebarbchenon et al, Hoarau et al |
|  | Miniopteridae | *Miniopterus gleni* | Yes | Lebarbchenon et al, Hoarau et al |
|  |  | *Miniopterus griveaudi* | Yes | Lebarbchenon et al, Hoarau et al |
|  |  | *Miniopterus mahafaliensis* | Yes | Hoarau et al |
|  |  | *Miniopterus soroculus* | Yes | Hoarau et al |
|  |  | *Miniopterus manavi* | Yes | Hoarau et al |
